# Supplementary material for: F-Box Gene D5RF Is Regulated by Agrobacterium Virulence Protein VirD5 and Essential for Agrobacterium-Mediated Plant Transformation
Source: MDPI journal article supplement (doi:10.3390/ijms21186731), 2020-09-14
Supplement: s1 [file s1]

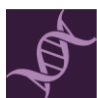

# F-box gene D5RF is regulated by *Agrobacterium* virulence protein VirD5 and essential for *Agrobacterium*-mediated plant transformation

Shaojuan Zhang, Zhuo Chen, Fei Huang, YaFei Wang and Meizhong Luo\*

College of Life Science and Technology, Huazhong Agricultural University, Wuhan 430070, China;

\*Author for correspondence: Meizhong Luo

Tel: +86 27 87284213 (office)

Email: mzl原因@mail.hzau.edu.cn

## Supporting information

Supplementary materials can be found at <https://www.ncbi.nlm.nih.gov/geo/query/acc.cgi?acc=GSE155112>.

Supplement Table 2 align\_pct and align\_region;

Supplement Table 3 *d5rf* vs col\_0\_deg\_all;

Supplement Table 4 *d5rf* vs col\_0\_Goerich;

Supplement Table 5 *d5rf* vs col\_0\_KEGGenrich.

The RNA-Seq raw data are deposited in NCBI'S Sequence Read Archive (SRA) with accession code PRJNA647639.

**Table S1.** The putative genes directly regulated by VirD5.

| Gene               | Protein          | No. of D5RE | Annotated functions                                        |
|--------------------|------------------|-------------|------------------------------------------------------------|
| <i>At2g04230</i>   | --               | 2           | F-box and LRR protein                                      |
| <i>AT5G16690</i>   | <i>ATORC3</i>    | 2           | Involved in double-strand break repair                     |
| <i>At3g19210</i>   | <i>RAD54</i>     | 2           | a member of the SWI2/SNF2 family of DNA-stimulated ATPases |
| <i>At5g49160</i>   | <i>DDM2/MET1</i> | 2           | cytosine methyltransferase                                 |
| <i>At3g49480.1</i> | <i>D5RF</i>      | 2           | F-box/LRR-repeat protein                                   |
| <i>At1g68910</i>   | <i>WIT2</i>      | 2           | WPP domain-interacting protein 2                           |

Note: D5RE indicates VirD5 response element (CCGCNG).

**Table S2.** List of oligonucleotides.

| Gene name          | Primer name  | Sequence                                | Restriction site |
|--------------------|--------------|-----------------------------------------|------------------|
| <i>AT3G49480.1</i> | p49480-F2    | 5'-GGgtaccTTACATAGAAACCACTAGTGACG-3'    | <i>KpnI</i>      |
|                    | P49480-R2    | 5'-CCGctcgagTCTGATCGGCTCTCCTTTC-3'      | <i>XhoI</i>      |
|                    | 49480-LUC-F3 | 5'-GGgtaccTACCGGATGCGATATGGCAG-3'       | <i>KpnI</i>      |
|                    | 49480-LUC-R3 | 5'-CGggtaccTCTGATCGGCTCTCCTTTCCA-3'     | <i>BamHI</i>     |
|                    | 49480-F4     | 5'-GGgtaccATGCCTAAGAGCTTTTACTT-3'       | <i>KpnI</i>      |
|                    | 49480-R4     | 5'-GGgtaccATATCTAAATGACATTCGAGC-3'      | <i>KpnI</i>      |
|                    | 49480-QF1    | 5'-GTTGGAATCACTTTTGGTTTGTCTC-3'         | -                |
|                    | 49480-QR1    | 5'-ACATCTTGAATAGAAGCTCGGTTGA-3'         | -                |
| <i>AT3G49480.2</i> | L49480-F1    | 5'-GGgtaccATGACAGAACTCGTCGAACATAG-3'    | <i>KpnI</i>      |
|                    | L49480-R1    | 5'-CATGcattggATATCTAAATGACATTCGAGCAG-3' | <i>NcoI</i>      |
| <i>AT5G16690</i>   | 16690-QF1    | 5'-TGATAAGGTTGCCACAGTCATAGAA-3'         | -                |
|                    | 16690-QR1    | 5'-GGTCTCCAAGTAAAGCAGATTGAAG-3'         | -                |

|                  |           |                                   |               |
|------------------|-----------|-----------------------------------|---------------|
| <i>AT5G49610</i> | 9160-QF1  | 5'-GAGTTTGCAGGGAACATAAATCACA-3'   | -             |
|                  | 9160-QR1  | 5'-TTCTTGAGATGTAGGGCTTCTTTGA-3'   | -             |
| <i>AT3G19210</i> | 19210-QF1 | 5'-ACATGGGTTTAGGGAAGACATTACA-3'   | -             |
|                  | 19210-QR1 | 5'-TCCTGTCTCCAACCCATTTCTTAAT-3'   | -             |
| <i>AT1G68910</i> | 8910-QF1  | 5'-GAAATGGAAAATGCAAATGAGTCGG-3'   | -             |
|                  | 8910-QR1  | 5'-ACTTCTAATTCCCTGACTTGCTTCT-3'   | -             |
| <i>AT2G04230</i> | 4230-QF1  | 5'-AGAGTTAGAGGAGGCAAAAATCAGT-3'   |               |
|                  | 4230-QR1  | 5'-TTTAACCTCAAGGGGTGATAAGTGT-3'   |               |
| <i>VirD5</i>     | D-F03     | 5'-ggatccATGACAGGAAAGTCGAAAGTT-3' | <i>Bam</i> HI |
|                  | D-R03     | 5'-gtcgacTCAGCGTTTAAACGCTTTGTC-3' | <i>Sal</i> II |
| <i>AT1G70880</i> | 70880-QF  | 5'-GGCTCACCCCTGAAACTCTCC-3'       |               |
|                  | 70880-QR- | 5'-ACGTGCGGCTCAGTGTTTAT-3'        |               |
| <i>AT1G70890</i> | 70890-QF  | 5'-GGGAGTCAGGGAGTATTGCG-3'        |               |
|                  | 70890-QR- | 5'-CTCGGCCAAGAGATGTTTCGT-3'       |               |
| <i>AT2G01520</i> | 1520-QF   | 5'-ACACAAGGAAGAGAGATGGCG-3'       |               |
|                  | 1520-QR   | 5'-GGGGAAGAGGTGTTCTCAC-3'         |               |
| <i>AT2G01530</i> | 1530-QF   | 5'-AAGAAGCGCACACACACAAC-3'        |               |
|                  | 1530-QR   | 5'-GTCGTGGACAGTGACACCTT-3'        |               |
| <i>AT2G02120</i> | 2120-QF   | 5'-TCAGCCGTTCTTTTCTTGGTG-3'       |               |
|                  | 2120-QR   | 5'-GCTCACGCATTTACCCTTGA-3'        |               |
| <i>AT3G26460</i> | 26460-QF  | 5'-CAACATCACCATCATCCCTATATGT-3'   |               |
|                  | 26460-QR  | 5'-AGAAAGTAACTCCACAAGACCCA-3'     |               |
| <i>AT5G36910</i> | 36910-QF  | 5'-GCATGCTTTCCGTGTCATCC-3'        |               |
|                  | 36910-QR  | 5'-TTGGAGAGTGGTCAAGGCAC-3'        |               |
| <i>AT5G44430</i> | 4430-QF   | 5'-TGGTGCTTGATCGTGTGTGTA-3'       |               |
|                  | 4430-QR   | 5'-AACAGTCCAACGTCGTACATAA-3'      |               |

-500 TTACATAGAAACCCTAGTGACGTAAAAAGCAATACTGTTTGGTGGTTTCTGAAGAGTCATTCCGTTT  
-431 TCACAAGGCACCTTTGTTAGAAGCGTTTGTGGATCGACCTCGGTCCACAATGTCCTATTAATGTTAATCC  
-362 TGTAAAGTGGGTGCAAAAAGTACTTGATACCAAGGGCGGATCTAGAATGTAATTTAATGTGGGGCACCA

VirD5 response element

-293 TATATATAAATAGTACTAAGTATAATTTAATTACCTAAATTGTATTGTATTATAAAATTATTTTTACAA  
-224 AAATAACA GTGCGGAGACTTGAAGTTCGGGTAGTAGGCACTTTTTGCTGGAAAACATTGAGTTA

VirD5 response element

-155 CCTGTATTACATTTGTTTAGTAGTAGCTTATAAAAATTTATAGAATTAGTATCAGGCACGTGCCCCAC  
-86 CTGCCTCCAACGTGGGTCCGCACTGCTTGATACTCGTGTGCGTTGGCTAACTTTCAGGCTCCTTTGGA  
-17 AAGGAGAGCCGATCAGA

**Figure S1.** The promoter sequence of *D5RF.1* gene (500 bp upstream of the translational start site), On the chromosome 3: 18342043-18342543. The red sequences are the possible binding sites of VirD5 protein (D5RE).

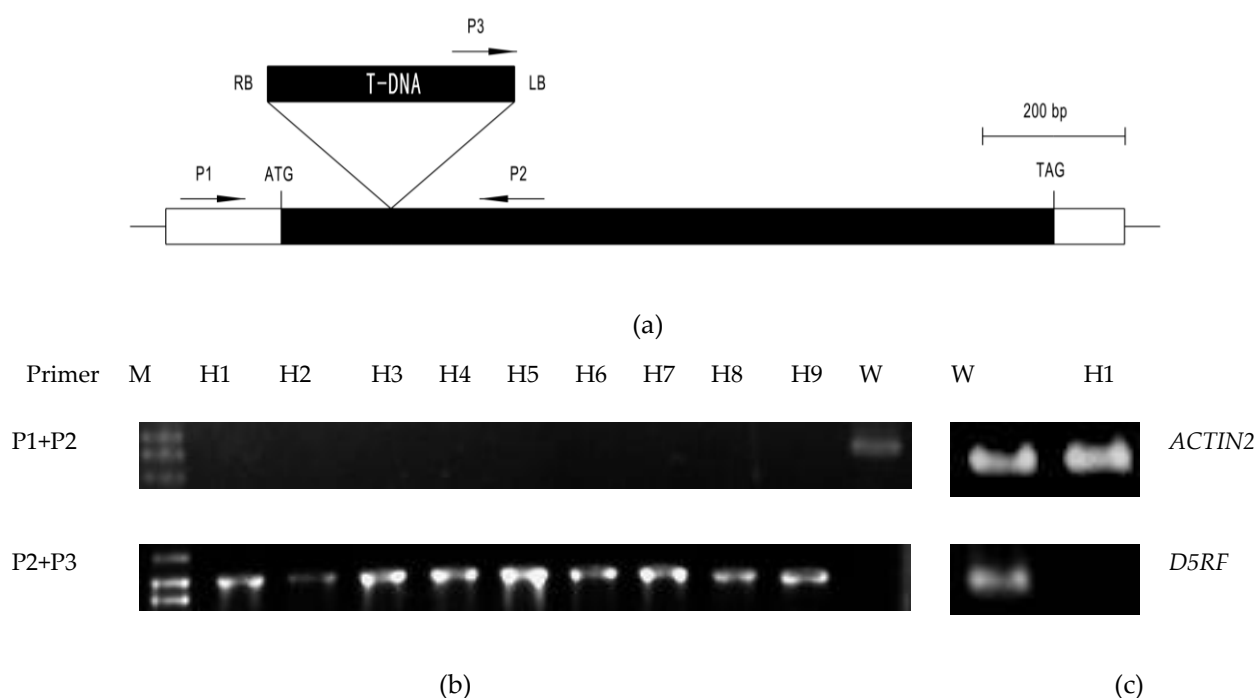

**Figure S2.** Identification of the *d5rf* mutant. (a) *D5RF.1* structure. The T-DNA was inserted into the exon approximately 200 bp downstream of the translational start site. P1, P2 and P3 indicate primers used for genotyping; RB and LB indicate the T-DNA right border and left border, respectively. (b) PCR genotyping of *d5rf* mutants. M indicates Marker. W and H indicate the wild-type and homozygous *d5rf* mutant plants, respectively. (c) RT-PCR analysis of *d5rf* and wild-type plants. RT-PCR showed that the expression level of *D5RF* was depressed in the *d5rf* mutant. Actin was used as the control; W, wild-type; H, homozygous *d5rf* mutant.

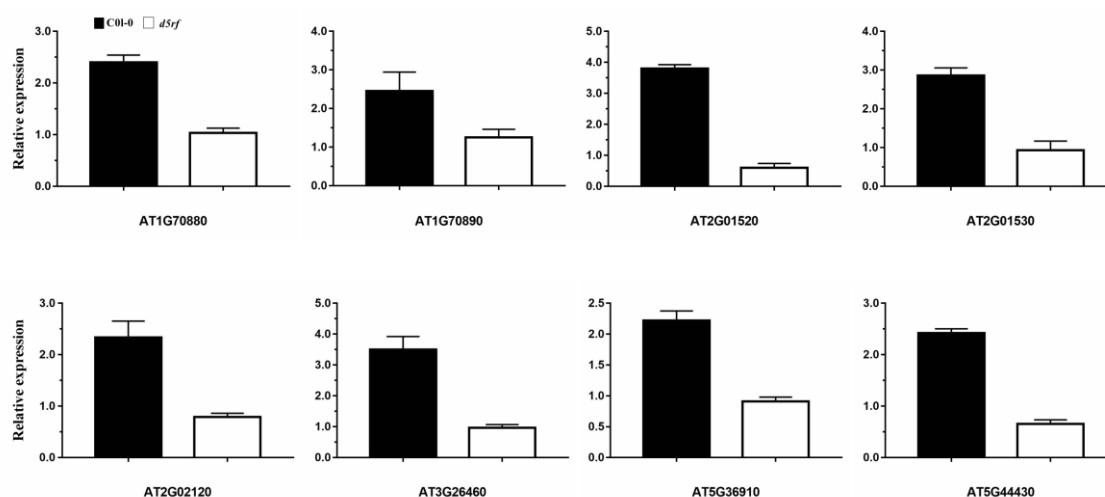

**Figure S3.** Validation of the RNA-Seq Data by Real-Time qRT-PCR. Eight different pathogen-responsive Genes genes that had less transcript abundance in *d5rf* compared with Col-0, based on RNA-Seq experiments, were selected for validation. Total RNA was extracted from leaves of wild-type Col-0 and *d5rf*. The first-strand cDNA was synthesized and used for qRT-PCR using gene-specific primers. The data represent the average of three biological replicates. each biological replicate includes three technical replicates. SE values were shown as error bars.
